# Supplementary material for: An experimental and theoretical study of the molecular structure and vibrational spectra of iodotrimethylsilane (SiIMe3)
Source: Royal Society of Chemistry journal article supplement (doi:10.1039/b510827f), 2005-11-08

**Table S1** Possible conformations with symmetry, energies (in kJ mol<sup>-1</sup>) and three lowest-lying frequencies (cm<sup>-1</sup>) for ITMS.

| Conformer                    | Arrangement <sup>a</sup> | Energy difference <sup>b</sup> | Frequencies <sup>c</sup>                |
|------------------------------|--------------------------|--------------------------------|-----------------------------------------|
| 1 ( <i>C</i> <sub>3v</sub> ) | 3S, 0E                   | 0.0                            | 162.5, 2 × 166.9                        |
| 2 ( <i>C</i> <sub>s</sub> )  | 2S, 1E                   | +7.1                           | 162.9 <i>i</i> , 170.0, 173.6           |
| 3 ( <i>C</i> <sub>s</sub> )  | 1S, 2E                   | +14.7                          | 179.0 <i>i</i> , 169.6 <i>i</i> , 175.2 |
| 4 ( <i>C</i> <sub>3v</sub> ) | 0S, 3E                   | +23.6                          | 197.7 <i>i</i> , 2 × 182.9 <i>i</i>     |

<sup>a</sup> S = Staggered (H-C-Si-I = 180°), E = Eclipsed (H-C-Si-I = 0°).

<sup>b</sup> Difference from the lowest energy conformer, calculated at the HF/3-21G\* level.

<sup>c</sup> All frequencies relate to motions of the methyl groups relative to the Si-I bond.

**Table S2** Natural coordinates defined for iodotrimethylsilane.

| Number | Description                             | Definition                                                                                                                                                                                                                   |
|--------|-----------------------------------------|------------------------------------------------------------------------------------------------------------------------------------------------------------------------------------------------------------------------------|
| 1-3    | Si-C stretch                            | R <sub>1-3</sub>                                                                                                                                                                                                             |
| 4-12   | C-H stretch                             | R <sub>4-12</sub>                                                                                                                                                                                                            |
| 13     | Si-I stretch                            | R <sub>13</sub>                                                                                                                                                                                                              |
| 14-16  | symmetric methyl deformation            | 6 <sup>-1/2</sup> (α <sub>1,4,7</sub> +α <sub>2,5,8</sub> +α <sub>3,6,9</sub> -β <sub>1,4,7</sub> -β <sub>2,5,8</sub> -β <sub>3,6,9</sub> )                                                                                  |
| 17-19  | asymmetric methyl deformation           | 6 <sup>-1/2</sup> (2α <sub>1,4,7</sub> -α <sub>2,5,8</sub> -α <sub>3,6,9</sub> )                                                                                                                                             |
| 20-22  | asymmetric methyl deformation           | 2 <sup>-1/2</sup> (α <sub>2,5,8</sub> -α <sub>3,6,9</sub> )                                                                                                                                                                  |
| 23-25  | methyl rock                             | 6 <sup>-1/2</sup> (2β <sub>1,4,7</sub> -β <sub>2,5,8</sub> -β <sub>3,6,9</sub> )                                                                                                                                             |
| 26-28  | methyl rock                             | 2 <sup>-1/2</sup> (β <sub>2,5,8</sub> -β <sub>3,6,9</sub> )                                                                                                                                                                  |
| 29     | symmetric SiC <sub>3</sub> deformation  | 6 <sup>-1/2</sup> (θ <sub>1</sub> +θ <sub>2</sub> +θ <sub>3</sub> -φ <sub>1</sub> -φ <sub>2</sub> -φ <sub>3</sub> )                                                                                                          |
| 30     | asymmetric SiC <sub>3</sub> deformation | 6 <sup>-1/2</sup> (2θ <sub>1</sub> -θ <sub>2</sub> -θ <sub>3</sub> )                                                                                                                                                         |
| 31     | asymmetric SiC <sub>3</sub> deformation | 2 <sup>-1/2</sup> (θ <sub>2</sub> -θ <sub>3</sub> )                                                                                                                                                                          |
| 32     | SiC <sub>3</sub> rock                   | 6 <sup>-1/2</sup> (2φ <sub>1</sub> -φ <sub>2</sub> -φ <sub>3</sub> )                                                                                                                                                         |
| 33     | SiC <sub>3</sub> rock                   | 2 <sup>-1/2</sup> (φ <sub>2</sub> -φ <sub>3</sub> )                                                                                                                                                                          |
| 34-36  | C-Si torsion                            | 9 <sup>-1/2</sup> (τ <sub>1,10,19</sub> +τ <sub>2,11,20</sub> +τ <sub>3,12,21</sub> +τ <sub>4,13,22</sub> +τ <sub>5,14,23</sub><br>+τ <sub>6,15,24</sub> +τ <sub>7,16,25</sub> +τ <sub>8,17,26</sub> +τ <sub>9,18,27</sub> ) |

α: H-C-H angle, β: H-C-Si angle, θ: C-Si-C angle, φ: C-Si-I angle

**Table S3** Geometric structures of SiMe<sub>3</sub>X (X = H, F, Cl, Br or I) at the HF level using the 3-21G\* and 6-31G\* basis sets, and at the MP2 level using the 6-31G\* basis set. For ITMS, the SDB-cc-pVTZ basis set and ECP was used for iodine with the higher-level calculations.<sup>a,b</sup>

| <b>H-SiMe<sub>3</sub></b>    |                  |                  |                   |
|------------------------------|------------------|------------------|-------------------|
| <b>Parameter<sup>c</sup></b> | <b>HF/3-21G*</b> | <b>HF/6-31G*</b> | <b>MP2/6-31G*</b> |
| C-H $\alpha$                 | 108.8            | 108.7            | 109.5             |
| C-H $\beta$                  | 108.8            | 108.7            | 109.4             |
| Si-C                         | 188.7            | 189.1            | 188.6             |
| Si-X                         | 148.3            | 148.4            | 149.5             |
| Si-C-H $\alpha$              | 111.2            | 111.3            | 110.9             |
| Si-C-H $\beta$               | 111.2            | 111.4            | 111.4             |
| C-Si-C                       | 110.3            | 110.4            | 110.2             |
| X-Si-C                       | 108.6            | 108.6            | 108.8             |
| Energy / Hartree             | -406.2998        | -408.3667        | -408.8433         |
| <b>F-SiMe<sub>3</sub></b>    |                  |                  |                   |
| <b>Parameter</b>             | <b>HF/3-21G*</b> | <b>HF/6-31G*</b> | <b>MP2/6-31G*</b> |
| C-H $\alpha$                 | 108.9            | 108.8            | 109.5             |
| C-H $\beta$                  | 108.8            | 108.7            | 109.4             |
| Si-C                         | 186.8            | 187.7            | 187.2             |
| Si-X                         | 160.5            | 161.0            | 163.6             |
| Si-C-H $\alpha$              | 110.9            | 111.2            | 110.8             |
| Si-C-H $\beta$               | 111.6            | 111.4            | 111.3             |
| C-Si-C                       | 110.9            | 111.4            | 111.2             |
| X-Si-C                       | 108.0            | 107.4            | 107.7             |
| Energy / Hartree             | -504.7284        | -507.3023        | -507.9508         |
| <b>Cl-SiMe<sub>3</sub></b>   |                  |                  |                   |
| <b>Parameter</b>             | <b>HF/3-21G*</b> | <b>HF/6-31G*</b> | <b>MP2/6-31G*</b> |
| C-H $\alpha$                 | 108.9            | 108.8            | 109.5             |
| C-H $\beta$                  | 108.7            | 108.6            | 109.3             |
| Si-C                         | 187.3            | 187.9            | 187.4             |
| Si-X                         | 108.2            | 209.5            | 208.6             |
| Si-C-H $\alpha$              | 110.6            | 110.5            | 110.5             |

|                  |           |           |           |
|------------------|-----------|-----------|-----------|
| Si-C-H $\beta$   | 111.3     | 111.4     | 111.2     |
| C-Si-C           | 111.5     | 111.5     | 111.4     |
| X-Si-C           | 107.3     | 107.3     | 107.5     |
| Energy / Hartree | -863.1956 | -867.3338 | -867.9373 |

### Br-SiMe<sub>3</sub>

| Parameter        | HF/3-21G*  | HF/6-31G*  | MP2/6-31G* |
|------------------|------------|------------|------------|
| C-H $\alpha$     | 108.9      | 108.8      | 109.5      |
| C-H $\beta$      | 108.7      | 108.6      | 109.3      |
| Si-C             | 187.3      | 187.8      | 187.3      |
| Si-X             | 222.1      | 224.5      | 224.8      |
| Si-C-H $\alpha$  | 110.3      | 110.3      | 110.2      |
| Si-C-H $\beta$   | 111.4      | 111.4      | 111.2      |
| C-Si-C           | 110.9      | 111.3      | 111.4      |
| X-Si-C           | 108.1      | 107.6      | 107.5      |
| Energy / Hartree | -2966.0659 | -2977.7481 | -2978.3360 |

### I-SiMe<sub>3</sub>

| Parameter        | HF/3-21G*  | HF/GEN <sup>d</sup> | MP2/GEN <sup>d</sup> |
|------------------|------------|---------------------|----------------------|
| C-H $\alpha$     | 108.9      | 108.8               | 109.6                |
| C-H $\beta$      | 108.6      | 108.5               | 109.4                |
| Si-C             | 1.876      | 188.2               | 187.7                |
| Si-X             | 2.501      | 250.3               | 248.7                |
| Si-C-H $\alpha$  | 110.1      | 110.1               | 110.1                |
| Si-C-H $\beta$   | 111.4      | 111.5               | 111.1                |
| C-Si-C           | 111.2      | 111.4               | 111.5                |
| X-Si-C           | 107.7      | 107.5               | 107.3                |
| Energy / Hartree | -7293.6875 | -419.0258           | -419.6477            |

<sup>a</sup> Distances in pm, angles in °

<sup>b</sup> See Figure 1 (main text) for a general structural overview of the molecules.

<sup>c</sup>  $\alpha$  = unique methyl hydrogen atom;  $\beta$  = symmetry-equivalent hydrogen atoms.

<sup>d</sup> 6-31G\* on H, C and Si, SDB-cc-pVTZ on I

**Table S4** Interatomic distances ( $r_a$ /pm) and amplitudes of vibration ( $u_{h1}$ /pm) for the GED structure of ITMS with those calculated at the HF/6-31G\*\*/SDB-cc-pVTZ level ( $u_{\text{calc}}$ ).<sup>a,b</sup>

| Number | Atom pair    | $r_a$ / pm | $u_{h1}$ / pm | Restraint | $k_{h1}$ / pm | $u_{\text{calc}}$ / pm |
|--------|--------------|------------|---------------|-----------|---------------|------------------------|
| 1      | C(3)-H(5)    | 108.9(3)   | 8.4(3)        | 7.5(7)    | 0.4           | 7.5                    |
| 2      | Si(1)-C(3)   | 187.3(1)   | 4.5(1)        | -         | 0.1           | 5.1                    |
| 3      | Si(1)-I(2)   | 248.5(2)   | 4.5(3)        | -         | 0.0           | 5.8                    |
| 4      | C(3)...C(7)  | 310.2(2)   | 10.0(6)       | -         | -0.2          | 10.0                   |
| 5      | I(2)...C(3)  | 350.9(2)   | 9.8(3)        | -         | -0.3          | 10.6                   |
| 6      | I(2)...H(5)  | 361.6(10)  | 25.6(17)      | 24.2(24)  | 0.4           | 24.2                   |
| 7      | I(2)...H(4)  | 448.0(7)   | 12.1(18)      | -         | -3.3          | 12.1                   |
| 8      | H(5)...H(6)  | 175.6(5)   | 12.0(fixed)   | -         | -0.1          | 12.0                   |
| 9      | Si(1)...H(4) | 246.8(12)  | 11.8(fixed)   | -         | -0.3          | 11.8                   |
| 10     | Si(1)...H(5) | 247.7(7)   | 11.6(fixed)   | -         | -0.3          | 11.6                   |
| 11     | H(5)...H(14) | 306.1(13)  | 32.4(fixed)   | -         | -3.7          | 32.4                   |
| 12     | H(4)...H(9)  | 317.3(28)  | 32.2(fixed)   | -         | -3.1          | 32.2                   |
| 13     | C(3)...H(10) | 329.4(6)   | 22.2(fixed)   | -         | 0.4           | 22.2                   |
| 14     | C(3)...H(9)  | 334.2(13)  | 22.1(fixed)   | -         | 0.3           | 22.1                   |
| 15     | H(4)...H(10) | 359.7(10)  | 35.0(fixed)   | -         | -0.9          | 35.0                   |
| 16     | C(3)...H(8)  | 402.0(5)   | 11.6(fixed)   | -         | -2.8          | 11.6                   |
| 17     | H(5)...H(10) | 425.5(11)  | 22.3(fixed)   | -         | -2.9          | 22.3                   |
| 18     | H(4)...H(8)  | 431.3(13)  | 22.0(fixed)   | -         | -3.1          | 22.0                   |
| 19     | H(5)...H(8)  | 484.5(12)  | 14.5(fixed)   | -         | -4.7          | 14.5                   |

<sup>a</sup> Estimated standard deviations, obtained in the least-squares refinement, are given in parentheses.

<sup>b</sup> Amplitudes not refined were fixed at the values obtained using a force field obtained at the HF level with the 6-31G\* basis set on H, C and Si, and the SDB-cc-pVTZ basis set on I.

**Table S5** Least-squares correlation matrix ( $\times 100$ ) for the GED refinement of ITMS.<sup>a</sup>

|       | $k_2$ |
|-------|-------|
| $u_2$ | 58    |
| $u_3$ | 63    |

<sup>a</sup> Only elements with absolute values  $\geq 50\%$  are shown;  $k_2$  is a scale factor.

**Table S6** Experimental GED coordinates (Å) from the refinement of the  $C_{3v}$  structure of ITMS.

| <b>Atom</b> | <b>x</b> | <b>y</b> | <b>z</b> |
|-------------|----------|----------|----------|
| Si(1)       | 0.000    | 0.000    | 0.000    |
| I(2)        | 2.486    | 0.000    | 0.000    |
| C(3)        | -0.536   | 1.794    | 0.000    |
| H(4)        | -1.626   | 1.868    | 0.000    |
| H(5)        | -0.164   | 2.317    | 0.883    |
| H(6)        | -0.164   | 2.317    | -0.883   |
| C(7)        | -0.536   | -0.897   | -1.554   |
| H(8)        | -0.164   | -1.923   | -1.565   |
| H(9)        | -1.626   | -0.934   | -1.618   |
| H(10)       | -0.164   | -0.394   | -2.448   |
| C(11)       | -0.536   | -0.897   | 1.554    |
| H(12)       | -1.626   | -0.934   | 1.618    |
| H(13)       | -0.164   | -1.923   | 1.565    |
| H(14)       | -0.164   | -0.394   | 2.448    |

**Table S7** Values of the scale factors associated with the normal coordinates defined for ITMS using the B3LYP method with three different basis sets.

|                                         | <b>DFT / B3LYP</b> |                  |                |
|-----------------------------------------|--------------------|------------------|----------------|
|                                         | <b>6-311G**</b>    | <b>LanL2DZdp</b> | <b>LanL2DZ</b> |
| SiC stretch                             | 1.051              | 1.033            | 1.049          |
| SiI stretch                             | 0.981              | 0.923            | 1.139          |
| CH stretch                              | 0.915              | 0.914            | 0.896          |
| CH <sub>3</sub> symmetric deformation   | 0.929              | 0.936            | 0.853          |
| CH <sub>3</sub> asymmetric deformation  | 0.925              | 0.929            | 0.897          |
| CH <sub>3</sub> rock                    | 0.893              | 0.908            | 0.731          |
| SiC <sub>3</sub> symmetric deformation  | 1.230              | 1.230            | 1.410          |
| SiC <sub>3</sub> asymmetric deformation | 1.108              | 1.083            | 1.131          |
| SiC <sub>3</sub> rock                   | 1.112              | 1.170            | 1.254          |
| SiC torsion                             | 1.000              | 1.000            | 1.000          |

**Figure S1** Experimental and final weighted difference (experimental – theoretical) molecular-scattering intensities for ISiMe<sub>3</sub>.

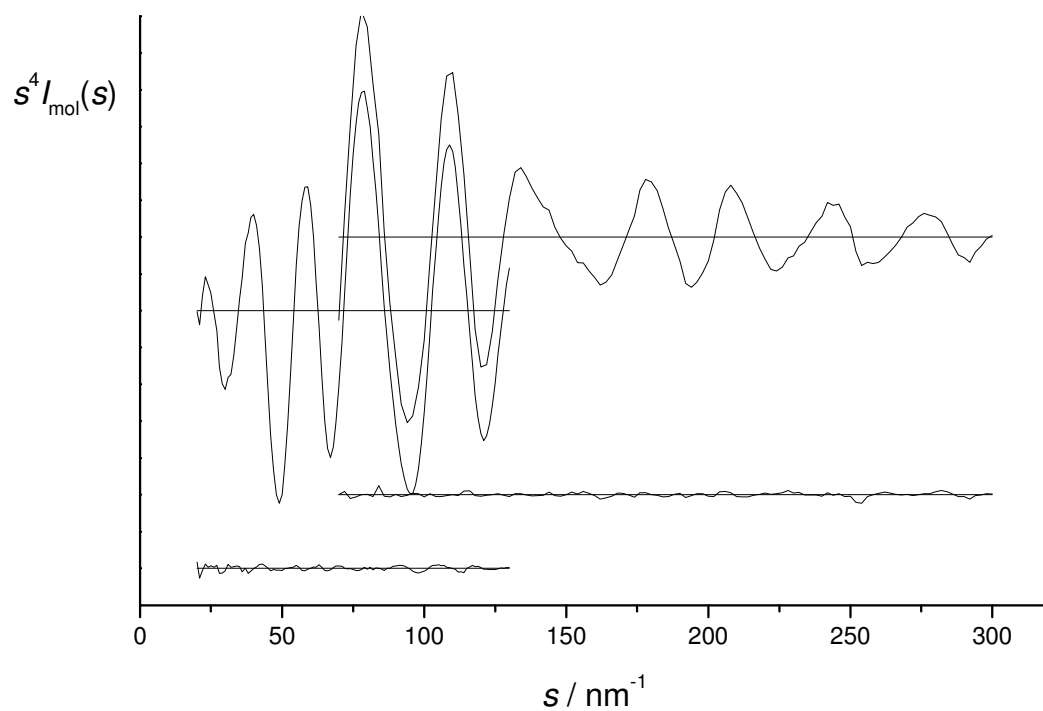

**Figure S2** IR spectrum (liquid phase) (upper) compared with the calculated spectrum of the liquid using B3LYP/LanL2DZ and B3LYP/LanL2DZdp after scaling (lower), in the region from 3150 to 2850 cm<sup>-1</sup>.

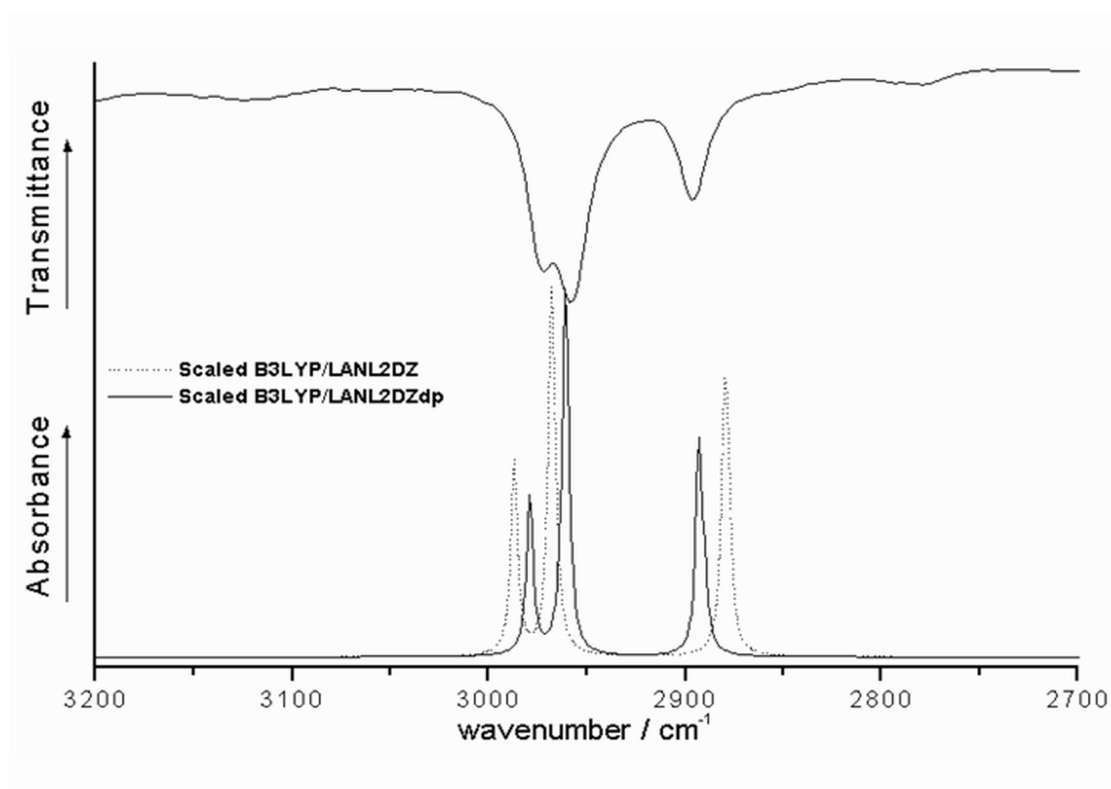

Supplement: b510827f.pdf [file b510827f.pdf]
